# Supplementary material for: High Glucose Promotes Inflammation and Weakens Placental Defenses against E. coli and S. agalactiae Infection: Protective Role of Insulin and Metformin
Source: MDPI journal article supplement (doi:10.3390/ijms24065243), 2023-03-09
Supplement: s1 [file s1]

**Supplementary Table S1.** Osmolarity in supplemented media culture adjusted with different glucose and mannitol concentrations

| Treatment                      | mOsm | Osmolarity should be equivalent to |
|--------------------------------|------|------------------------------------|
| 5 mM glucose                   | 316  |                                    |
| 10 mM glucose                  | 320  |                                    |
| 50 mM glucose                  | 353  |                                    |
| 5 mM glucose + mannitol 5 mM   | 320  | 10 mM glucose                      |
| 10 mM glucose + mannitol 40 mM | 346  | 50 mM glucose                      |

Media base was DMEM low-glucose + 10% FBS + 1% sodium pyruvate + 1% penicillin/streptomycin

**Supplementary Table S2.** Placental adipokine secretion under normoglycemic and hyperglycemic conditions.

|                                           | <b>Visfatin</b>            | <b>Chemerin</b>            | <b>Adiponectin</b>          | <b>Leptin</b>            |
|-------------------------------------------|----------------------------|----------------------------|-----------------------------|--------------------------|
| <b>Glucose 10 mM</b>                      | 10,248<br>(8,648 – 13,460) | 9,297<br>(5,689 – 17,767)  | 28,007<br>(20,867 – 47,727) | 425.1<br>(297.9 – 652.1) |
| <b>Glucose 50 mM</b>                      | 7,749<br>(5,459 – 9,972) # | 10,578<br>(7,857 – 18,209) | 28,781<br>(19,823 – 51,499) | 435<br>(270.5 – 799.3)   |
| <b>Glucose 10 mM<br/>+ Insulin 500 nM</b> | 13,710<br>(9,978 – 19,128) | 10,140<br>(7,604 – 16,828) | 23,888<br>(16,372 – 39,535) | 379<br>(271.7 – 652.1)   |
| <b>Glucose 50 mM<br/>+ Insulin 50 nM</b>  | 3,159<br>(1,972 – 5,317) * | 12,278<br>(8,234 – 19,831) | 21,039<br>(15,055 – 38,694) | 492.9<br>(329.4 – 715)   |
| <b>Glucose 50 mM<br/>+ Insulin 100 nM</b> | 4,327<br>(2,999 – 8,064) * | 11,881<br>(8,804 – 16,323) | 26,684<br>(20,236 – 50,233) | 405.7<br>(312.1 – 608)   |
| <b>Glucose 50 mM<br/>+ Insulin 500 nM</b> | 4,058<br>(2,191 – 6,727) * | 11,980<br>(8,086 – 18,622) | 33,429<br>(22,327 – 53,150) | 343.2<br>(229 – 511.7)   |
| <b>Glucose 10 mM<br/>+ Metformin 500</b>  | 11,777<br>(8,575 – 14,692) | 6,187<br>(3,381 – 12,603)  | 27,641<br>(18,569 – 48,020) | 410.6<br>(329 – 756.7)   |
| <b>Glucose 50 mM +<br/>Metformin 125</b>  | 8,893<br>(5,200 – 12,345)  | 9,240<br>(4,345 – 15,842)  | 34,539<br>(19,751 – 55,366) | 334.9<br>(240 – 495.4)   |
| <b>Glucose 50 mM +<br/>Metformin 250</b>  | 6,348<br>(3,605 – 9,766)   | 7,714<br>(5,211 – 14,340)  | 27,952<br>(20,368 – 63,250) | 618.9<br>(265.8 – 838.6) |
| <b>Glucose 50 mM<br/>+ Metformin 500</b>  | 6,171<br>(3,084 – 9,905)   | 8,871<br>(4,611 – 15,371)  | 35,553<br>(20,667 – 60,592) | 334.9<br>(211.6 – 465.5) |

Visfatin, chemerin, leptin, and adiponectin levels are shown in pg/mL/ g of tissue. #,  $p < 0.05$  vs Glucose 10 mM. \*,  $p < 0.05$  vs Glucose 50 mM.  $n = 6 - 7$  independent experiments in triplicate. One-way ANOVA (Kruskal-Wallis test) followed by Dunn's multiple comparisons post-hoc. Data is presented as median (interquartile range).

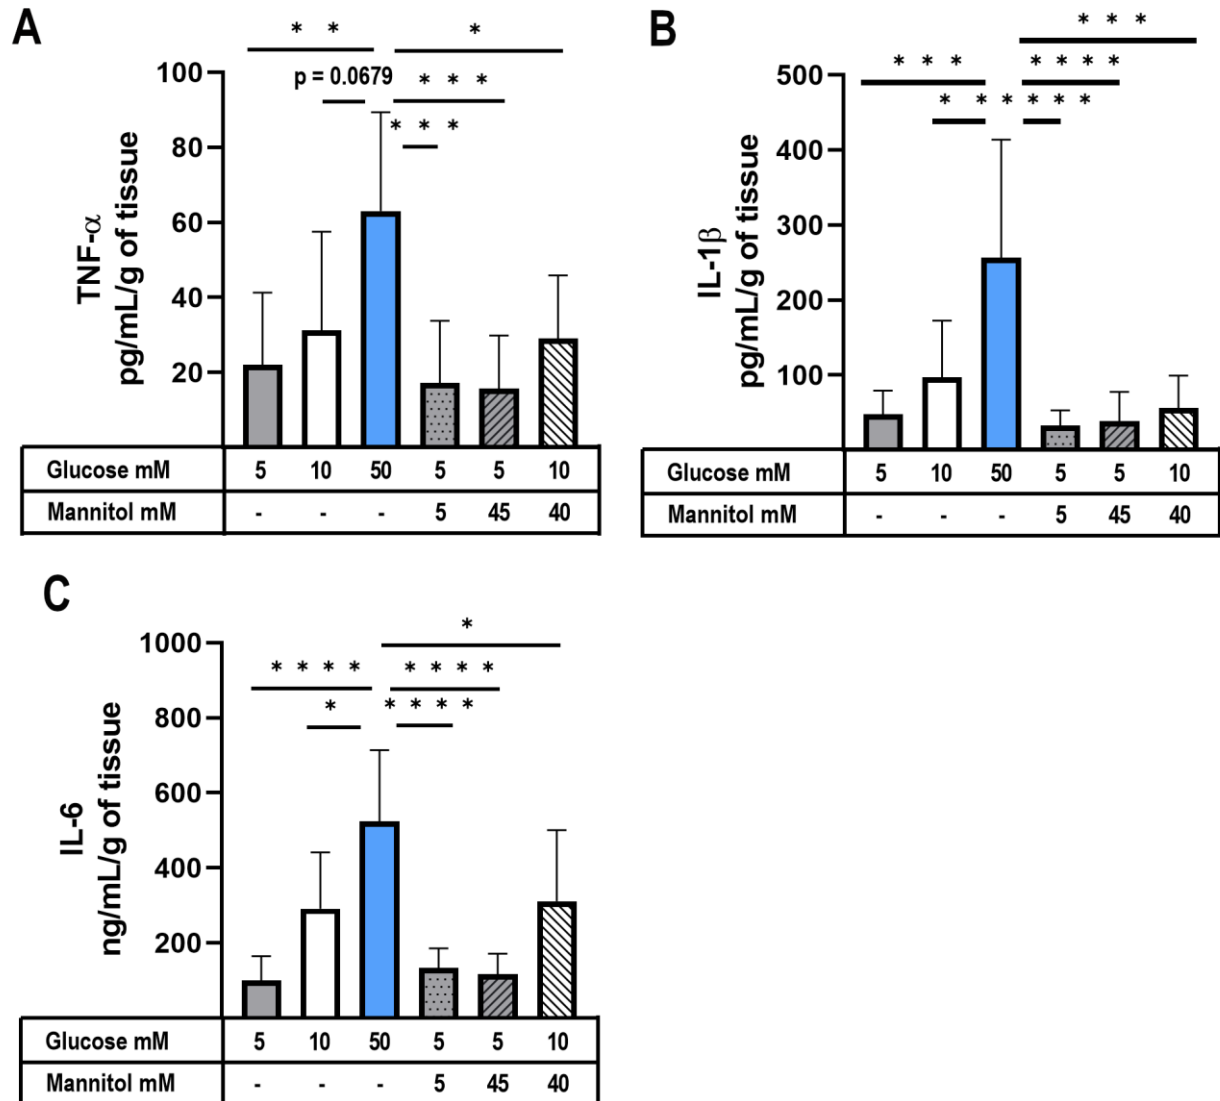

**Supplementary Figure S1. High osmolar pressure does not increase secretion of pro-inflammatory cytokines in cultured placental explants.** Placental explants secretion of A) TNF- $\alpha$ , B) IL-1 $\beta$ , and C) IL-6. Explants were exposed to glucose and co-incubated with mannitol for 48 hours. Treatments and culture media were refreshed at 24 hours.  $n = 3$  independent experiments in triplicate. Data are presented as mean and standard deviation. One-way ANOVA followed by Tukey's multiple comparisons post-hoc due to normal distribution \*,  $p < 0.05$ ; \*\*,  $p < 0.01$ ; \*\*\*,  $p < 0.001$ ; \*\*\*\*,  $p < 0.0001$

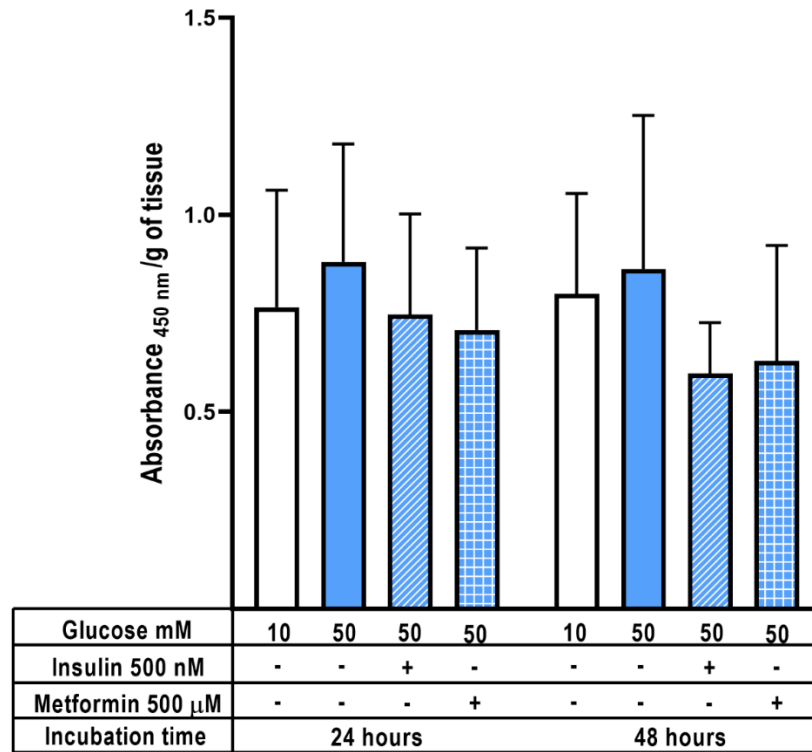

**Supplementary Figure S2. Insulin and metformin do not modify viability of placental explant along 48 hours of culture.** XTT cell viability assay of placental explants incubated along 48 hours with culture media adjusted with glucose 10 mM (white bar) or 50 mM (blue bar).  $n = 3$  independent experiments in triplicate. Two-way ANOVA (mixed effects analysis) followed by Tukey's multiple comparisons test. No significant differences were detected. Data is presented as mean and standard deviation.
